# Supplementary material for: CAVaLRi: An Algorithm for Rapid Identification of Diagnostic Germline Variation
Source: Hindawi journal article supplement (doi:10.1155/2024/6411444), 2024-04-29
Supplement: f1 [file 6411444.f1.pdf]

--- SUPPLEMENTAL MATERIALS ---

**CAVALRI: AN ALGORITHM FOR RAPID IDENTIFICATION OF DIAGNOSTIC  
GERMLINE VARIATION**

Robert J. Schuetz<sup>1,2</sup>, Austin A. Antoniou<sup>2</sup>, Grant E. Lammi<sup>1</sup>, David M. Gordon<sup>1</sup>,  
Harkness C. Kuck<sup>1</sup>, Bimal P. Chaudhari<sup>2,3,4,5†</sup> and Peter White<sup>1,2,3\*</sup>

- <sup>1</sup> The Office of Data Sciences, The Abigail Wexner Research Institute, Nationwide Children's Hospital, Columbus, Ohio, USA
- <sup>2</sup> The Steve and Cindy Rasmussen Institute for Genomic Medicine, The Abigail Wexner Research Institute, Nationwide Children's Hospital, Columbus, Ohio, USA
- <sup>3</sup> Department of Pediatrics, The Ohio State University College of Medicine, Columbus, Ohio, USA
- <sup>4</sup> Divisions of Neonatology, Genetics and Genomic Medicine, Nationwide Children's Hospital, Columbus, OH, USA.
- <sup>5</sup> Center for Clinical and Translational Science, The Ohio State University and Nationwide Children's Hospital, Columbus, OH, USA.

**\*Corresponding Author:** Peter White, Ph.D., Battelle Endowed Chair for Quantitative and Computational Medicine, The Steve and Cindy Rasmussen Institute for Genomic Medicine, Nationwide Children's Hospital, 575 Children's Crossroad, Columbus, OH 43215. USA. Email: [peter.white@nationwidechildrens.org](mailto:peter.white@nationwidechildrens.org)

**† Co-Corresponding Author:** Bimal P. Chaudhari, MD, MPH, The Steve and Cindy Rasmussen Institute for Genomic Medicine, Nationwide Children's Hospital, 575 Children's Crossroad, Columbus, OH 43215. USA. Email: [bimal.chaudhari@nationwidechildrens.org](mailto:bimal.chaudhari@nationwidechildrens.org)

**Keywords:** clinical genomics, variant prioritization, variant interpretation, rare disease, genetics

**Running title:** Probabilistic ranking of genomic variation

## Mathematical Description

### Clinical Assessment of Variants by Likelihood Ratio (CAVaLRi) framework overview

LRs are advantageous, intuitive, and can be converted to posterior probabilities given some observed diagnostic evidence ( $E$ ) and a prior probability ( $p$ ). “Diagnostic evidence” in this context is a set of variant features identified by genomic sequencing, their segregation in a pedigree, and phenotypic information derived from a patient chart (manually or via NLP). Using a formulation of Bayes' theorem tailored for the LR context, these posterior probabilities are highly interpretable when determining if a given disease is present (Equation 1).  $\Pr(D|E)$  is the posterior probability, i.e., the probability of disease  $D$  being present given diagnostic evidence  $E$ .  $p$  is the prior probability, which represents our initial belief or estimate of the likelihood of the disease before seeing any diagnostic evidence.  $LR_D$  is the LR for disease  $D$ , which quantifies how many times more likely a disease is to be present given  $E$  compared to its absence. This equation is used to update our initial belief (prior probability) based on new evidence (phenotypes and ES/GS results) to produce a revised belief (posterior probability).

$$\Pr(D | E) = \frac{p \cdot LR_D}{(1-p) + (p \cdot LR_D)} \quad (1)$$

Components of the clinical diagnosis workflow can be modeled by separate LRs representing the contribution of phenotypic ( $LR_{\text{pheno}}$ ), genotypic ( $LR_{\text{geno}}$ ), and segregation ( $LR_{\text{seg}}$ ) information to posterior belief in a given diagnosis. The product of these individual LRs are equivalent to a single composite LR ( $LR_D$ ) (Equation 2).

$$LR_D = LR_{\text{pheno}} \cdot LR_{\text{geno}}^{c_1} \cdot LR_{\text{seg}}^{c_2} \quad (2)$$

CAVaLRi departs from the traditional LR definition by introducing a statistical learning technique. This technique empirically corrects for misspecification of the

component LRs by optimizing the relative weights between LRs ( $c_1, c_2$ ), resulting in enhanced performance and accuracy (**Figure 2**). Of note, CAVaLRi ultimately prioritizes genes rather than variants or diseases. As such, the highest-scoring disease associated with a given gene  $G$  is chosen to represent the CAVaLRi gene score (Equation 3). In simple terms, the equation states that the highest LR among all diseases associated with gene  $G$  ( $D_G$ ) determines the LR for a gene ( $LR_G$ ). If a gene is linked to multiple diseases, and one of those diseases has strong diagnostic evidence (high LR), then the gene will inherit that strong evidence score. This approach effectively elevates the most compelling evidence from the disease-specific level to the broader gene-associated context.

$$LR_G = \max_{D \in D_G} (LR_D) \quad (3)$$

## Phenotype Likelihood Calculation

### *Estimation of LR<sub>pheno</sub>*

The CAVaLRi  $LR_{pheno}$  for a given disease ( $D$ ) and a given patient phenotype ( $x_p$ ) ( $LR_{phenoD}(x_p)$ ) is calculated by dividing the probability of observing phenotype  $x_p$  given that disease  $D$  is present ( $\Pr(x_p|D)$ ) by the probability of observing phenotype  $x_p$  in an instance of any other RGD except  $D$  ( $\Pr(x_p|\neg D)$ ). This can be rewritten as a quotient of conditional probabilities. To limit the capacity for relatively small values to penalize the overall phenotype score, the maximum is returned between the calculated quotient and a configurable minimum phenotype score (value of 1 determined by grid search optimization, Supplemental Figure 1(c); Equation 4):

$$LR_{phenoD}(x_p) = \max\left(\frac{\Pr(x_p|D)}{\Pr(x_p|\neg D)}, 1\right) \quad (4)$$

A disease-phenotype frequency map for the candidate disease ( $F_D$ ) must be generated before calculating  $\Pr(x_p|D)$ . If a term  $x$  has a frequency for disease  $D$  in HPO annotations, we set  $F_D(x)$  to be equal to that frequency; however, if  $x$  has descendants with disease  $D$  frequency annotations, we set  $F_D(x)$  to be the maximum of descendent frequencies. When a patient phenotype term  $x_p$  lies within the ancestral closure of any term associated with disease  $D$  ( $X_D$ ), we define  $\Pr(x_p|D)$  to be equal to the value stored in the propagated frequency map,  $F_D(x)$ . If  $x$  does not belong to the ancestral closure of  $X_D$ , the set of most recent common ancestors are determined between  $x_p$  and  $X_D$ , which we denote by  $X_{ca}$ . For each common ancestor term  $x_{ca} \in X_{ca}$ , a candidate value of  $\Pr(x_p|D)$  is calculated by taking the product of the  $x_{ca}$  disease frequency,  $F_D(x_{ca})$ , and the ratio of the genes associated with  $x_p$ , ( $G_{x_p}$ , gene count  $|G_{x_p}|$ ), versus the number of genes associated with  $x_{ca}$ , ( $G_{x_{ca}}$ , gene count  $|G_{x_{ca}}|$ ). This penalty effectively drives candidate values of  $\Pr(x_p|D)$  lower the farther  $x_{ca}$  is in the ontology. The maximum score amongst all candidate values is taken to estimate  $\Pr(x_p|D)$ . Of note, the  $x_{ca}$  that maximizes  $\Pr(x_p|D)$  is almost always the closest to  $x_p$  in the HPO graph due to the relatively less penalizing value of  $\frac{|G_{x_p}|}{|G_{x_{ca}}|}$  (smallest value of  $|G_{x_{ca}}|$ ). This property is not guaranteed in the presence of multiple parentage, which is why  $|G_{x_{ca}}|$  is calculated for all  $x_{ca} \in anc(X_{ca})$ . We denote the  $x_{ca}$  that maximizes  $\Pr(x_p|D)$  as  $x_{ca}^*$ . (Figure 3(c), Equation 5).

$$\Pr(x_p|D) = \begin{cases} F_D(x_p) & , x_p \in anc(X_D) \\ \max_{x_{ca} \in X_{ca}} F_D(x_{ca}) \cdot \frac{|G_{x_p}|}{|G_{x_{ca}}|} = F_D(x_{ca}^*) \cdot \frac{|G_{x_p}|}{|G_{x_{ca}^*}|} & , x_p \notin anc(X_D) \end{cases} \quad (5)$$

We estimate  $\Pr(x_p|\neg D)$  using the HPO annotations table, specifically dividing the number of RGDs associated with  $x_{ca}^*$  by the total number of diseases with phenotype-disease annotations. In essence, more specific terms will have lower frequencies, while more general terms will have higher frequencies due to associations with multiple diseases. For example, the Kayser-Fleischer ring (HP:0200032) is a grey-green or brownish-pigmented ring around the edge of the cornea. Currently, this term is only associated with a single disease, Wilson disease (OMIM: 277900, an RGD that prevents the body from removing extra copper). Given the uniqueness of the term-disease association and the fact that  $HP:0200032 \in anc(X_{OMIM: 277900})$  ( $x_{ca}^* = HP:0200032$ ), the  $\Pr(x_p|\neg D)$  for Kayser-Fleischer ring would be  $\frac{1}{|OMIM\ diseases|}$ . However, the parent term of Kayser-Fleischer ring is corneal opacity (HP:0007957), a term with 19 child terms associated with 329 diseases. This less specific term would have a  $\Pr(x_p|\neg D)$  of  $\frac{329}{|OMIM\ diseases|}$ .

Multiple LR<sub>s</sub> for individual phenotypic abnormalities present in a patient can be multiplied together to compute an aggregate LR for a disease  $D$  and a set of patient phenotypes  $X_p$ . Assuming independence between phenotypic abnormalities  $x_p \in X_p$ , this aggregate LR can be calculated by taking the product of all  $LR_{phenod}(x_p)$  for  $x_p \in X_p$  (Equation 6):

$$LR_{phenod}(X_p) = \prod_{x_p \in X_p} LR_{phenod}(x_p) \quad (6)$$

CAVaLRi introduces a novel, iterative procedure to detect phenotype-disease signal by incrementing the number of ordered patient phenotypes to consider (Supplemental Figure 1(a,b)). Initially, the top-ranked phenotype is assessed individually, followed by the product of scores for the top two phenotypes. This process continues, combining scores for the top- $i$  ranked phenotypes

( $LR_D(X_{p(1,i)})$ ), until reaching a maximum of 19 phenotypes. (value of 19 determined by grid search optimization, Supplemental Figure 1(c)). For each subset, the value of  $LR_D(X_{p(1,i)})$  is stored in a vector. The maximum of these values is returned to represent the phenotypic evidence in support of a diagnosis of disease  $D$  (Equation 7):

$$LR_{\text{pheno}D} = \max_{1 \leq i \leq 19} LR_{\text{pheno}D}(X_{p(1,i)}) \quad (7)$$

### Genotype Likelihood Calculation

Once all variants are scored with functional region-specific pathogenicity *in silico* predictors, the CAVaLRi  $LR_{\text{geno}}$  is calculated for all genes with possibly disease-causal variants. We define the CAVaLRi  $LR_{\text{geno}}$  as follows (Equation 8):

$$LR_{\text{geno}} = \frac{\Pr(gt|D)}{\Pr(gt|\neg D)} \quad (8)$$

By applying Bayes' Rule,  $\Pr(gt|D)$  can be converted to conditional probabilities that are easier to calculate (Equation 9).

$$\frac{\Pr(gt|D)}{\Pr(gt|\neg D)} = \frac{\Pr(D|gt)*\Pr(gt)}{\Pr(gt|\neg D)*\Pr(D)} \quad (9)$$

The probability of observing a genotype in the non-disease population ( $\Pr(gt|\neg D)$ ) is roughly equivalent to observing a genotype in the general population,  $\Pr(gt)$ , given the relatively low incidence of any individual RGD. As such, these terms can be canceled in the final  $LR_{\text{geno}}$  calculation (Equation 10).

$$\frac{\Pr(D|gt)*\Pr(gt)}{\Pr(gt|\neg D)*\Pr(D)} \approx \frac{\Pr(D|gt)}{\Pr(D)} \quad (10)$$

By substituting the probability of being diagnosed with  $D$  given the patient's genotype ( $\Pr(D|gt)$ ) with the obtained variant pathogenicity probabilities, the  $LR_{\text{geno}}$  can be calculated by dividing  $\Pr(D|gt)$  by prior probability of observing the disease ( $\Pr(D)$ ). This

prior probability of observing the disease is estimated by sampling a uniform distribution of all possible OMIM diseases, or  $\frac{1}{|\text{OMIM}|}$ , assuming a described genetic disease is present.

The last nuance of  $\text{LR}_{\text{geno}}$  calculation relates to genetic variants annotated as having pathogenic or likely pathogenic significance, according to ClinVar. If a gene contains such a variant, the  $\text{LR}_{\text{geno}}$  is heuristically squared to model the emphasis placed on these variants during review and under ACMG guidelines [8].

### Redefining posterior probability calculation

One obvious consequence of introducing hyperparameters is that the scaled LR no longer represents a true LR. To address this limitation, probability distributions were fitted to the CAVaLRi scores in diagnostic and non-diagnostic gene sets under the assumption of uniform prior probabilities for all diseases (Supplemental Figure 3(a,b)). Diagnostic odds can be calculated by comparing conditional probabilities of a given CAVaLRi gene score being sampled from either the diagnostic ( $\text{Pr}(\text{CAVaLRi score}|\text{Diag})$ ) or non-diagnostic distribution ( $\text{Pr}(\text{CAVaLRi score}|\neg\text{Diag})$ ) in context of prior frequencies ( $\text{Pr}(\text{Diag})$  and  $\text{Pr}(\neg\text{Diag})$ , respectively) (Equation 11):

$$\text{Diag}_{\text{odds}} = \frac{\text{Pr}(\text{CAVaLRi score}|\text{Diag}) * \text{Pr}(\text{Diag})}{\text{Pr}(\text{CAVaLRi score}|\neg\text{Diag}) * \text{Pr}(\neg\text{Diag})} \quad (11)$$

Conditional probabilities are drawn from fitted probability distributions, while prior probabilities are estimated from all scored genes in the clinical ES training partition. From the diagnostic odds, the probability that a given variant is diagnostic can be calculated (Equation 12):

$$\text{Pr}(\text{Diag}|\text{CAVaLRi score}) = \frac{1}{1 + \text{Diag}_{\text{odds}}} \quad (12)$$

This CAVaLRi definition of the posterior probability relies on probability distributions fitted to variant frequencies observed in the clinical ES training partition. Following variant preprocessing, CAVaLRi candidate variant lists are of similar length. This ensures that the ratio of diagnostic to non-diagnostic variants is comparable to those used to fit the probability distributions.



(a)

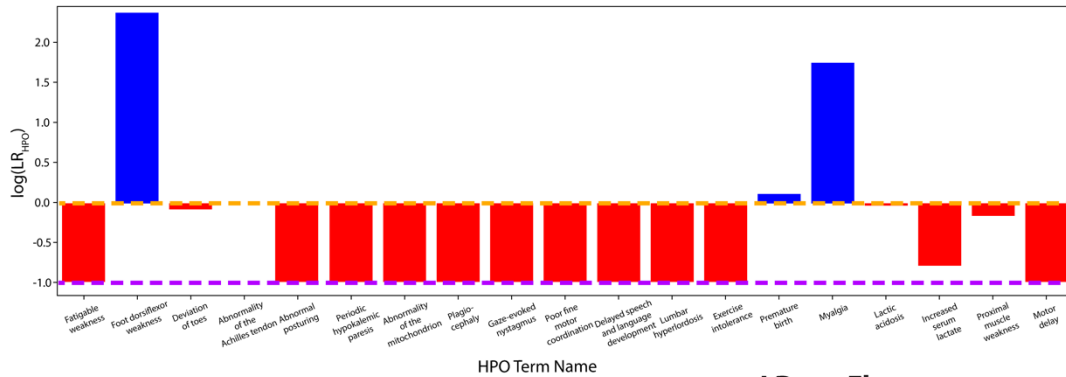

(b)

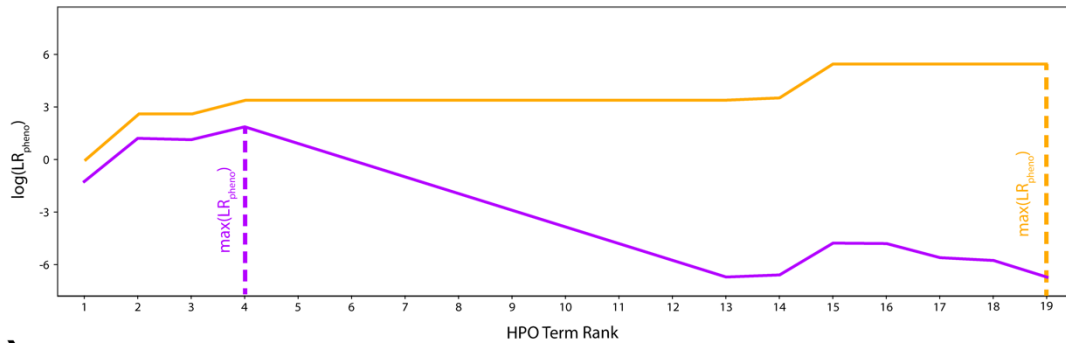

(c)

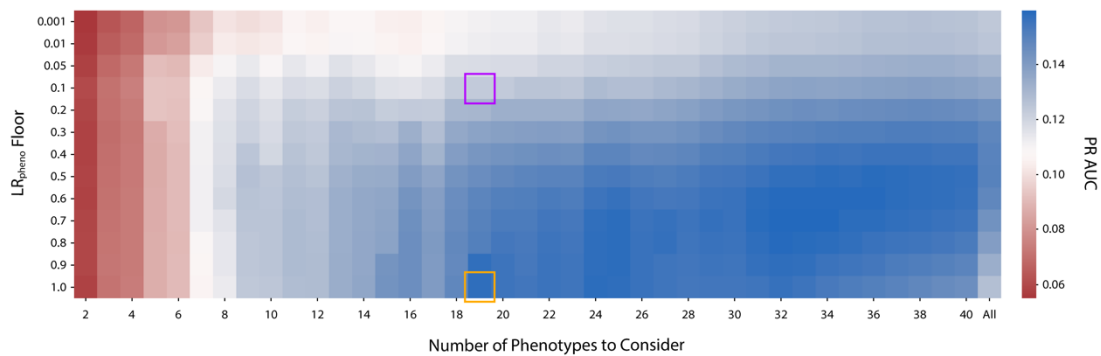

**SUPPLEMENTAL FIGURE 1. Optimization of CAVaLRi LR<sub>pheno</sub>.** (a) Each phenotype term is first ordered based on information content, from left to right in this example with the most informative phenotyping being “Fatigable Weakness”. All terms are then scored based on their relationship with the query disease’s phenotype terms (Equation 4). The “floor” value effectively limits how much one phenotype can penalize the overall phenotype score. Illustrated are two phenotype score floor scenarios, 0.1 and 1. (b) The CAVaLRi LR<sub>pheno</sub> of the patient’s phenotype set is calculated by taking the maximum of the cumulative LR<sub>pheno</sub> over

a range of phenotype set lengths. In this example, when individual term scores are floored at 0.1, the maximum  $LR_{\text{pheno}}$  occurs when the phenotype set contains 4 terms. When the floor value is increased to 1, the cumulative function is monotonically increasing, resulting in the maximum  $LR_{\text{pheno}}$  value occurring at the maximum set length value (19) (c) The selection of 19 as the maximum set length was determined empirically by greedy searching a two-dimensional hyperparameter space that includes maximum phenotype set length (x-axis) and the previously defined individual phenotype floor score (y-axis). The area under the precision-recall curve (PR AUC) of the maximum  $LR_{\text{pheno}}$  was chosen as the accuracy metric to optimize. Data from the training partition of the clinical ES cohort was utilized in calculating PR AUC. The greedy search was initiated at the origin of this hyperparameter space to favor smaller values. In the case of maximum phenotype set length, a smaller value would be favorable to accommodate cases with fewer phenotypes. A maximum phenotype set length of 19 and floor value of 1 were selected at the termination of the greedy search. Of note, PR AUC was lower when the floor value was set to 0.1 compared to 1, suggesting more accurate results when an individual term is not capable of penalizing the  $LR_{\text{pheno}}$  of the phenotype set.

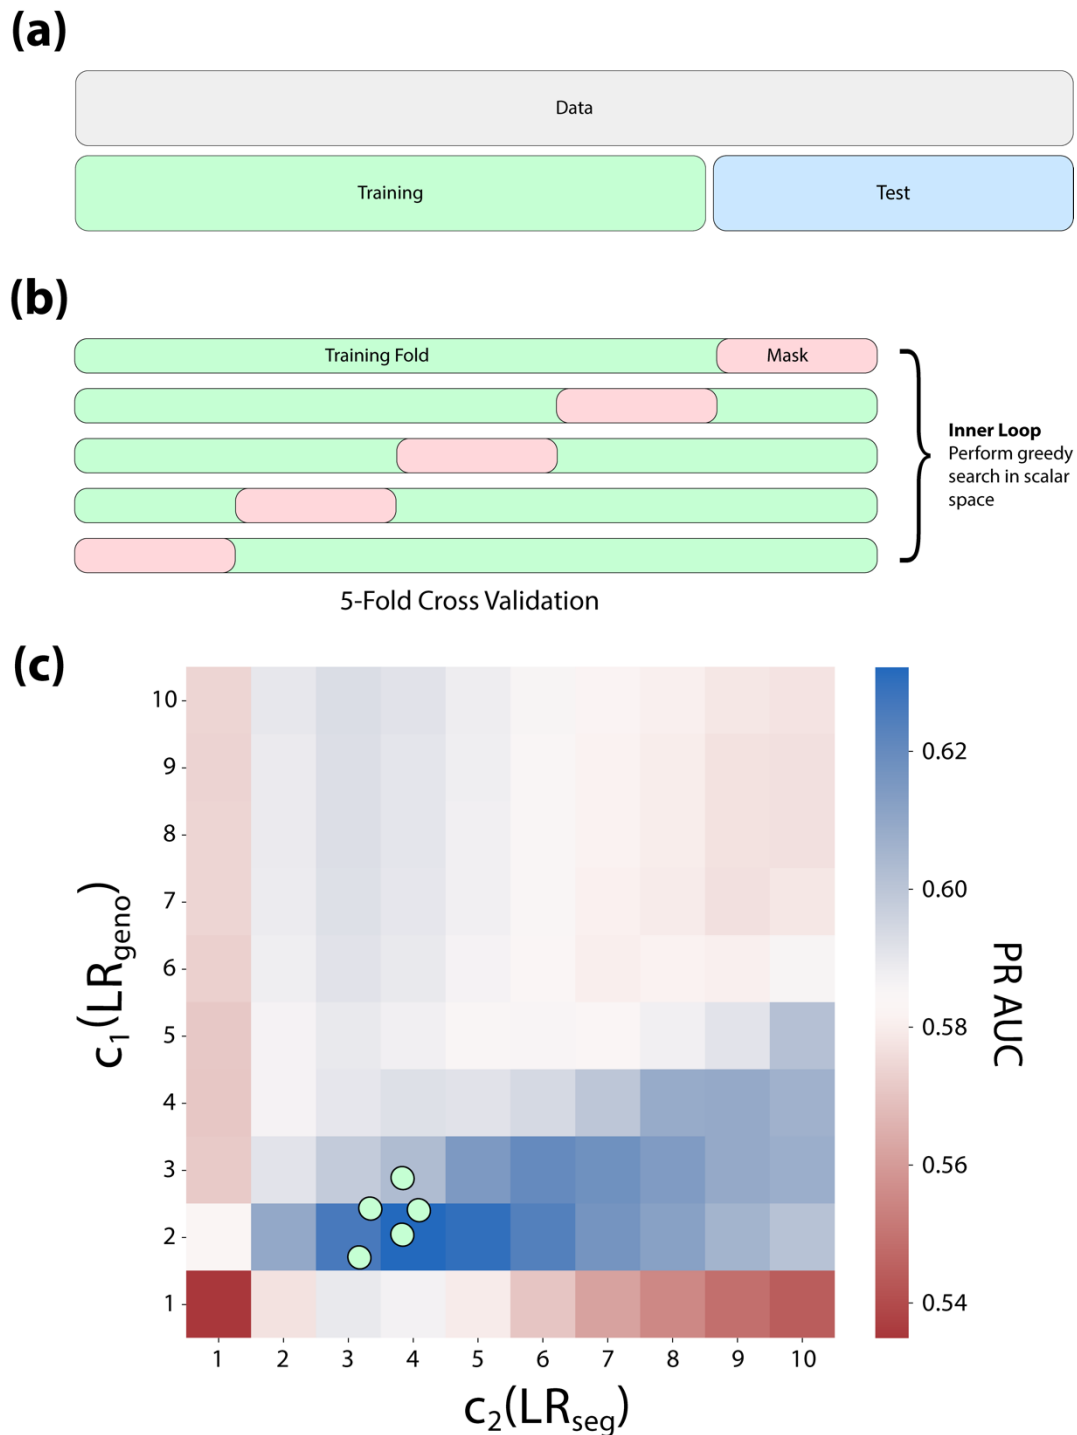

**SUPPLEMENTAL FIGURE 2. CAVaLRi statistical learning procedure** As opposed to available gene prioritization algorithms, CAVaLRi is trained to weight each component LR based on relative importance (Equation 2). **(a)** To ensure that CAVaLRi was naïve to a set of cases, the clinical ES cohort was split 70-30 into training and test partitions, respectively. **(b)** The training partition was further divided into 5 cross-folds to ensure that every training case

was masked during one iteration of hyperparameter tuning. **(C)** For each of the 5 iterations, unmasked training data was utilized in a greedy search procedure across two-dimensional scalar space to determine the relative importance of the  $LR_{\text{geno}}$  ( $c_1$  in Equation 2) and  $LR_{\text{seg}}$  ( $c_2$  in Equation 2). The greedy search was initialized at the origin. The area under the precision-recall curve (PR AUC) was selected as the optimized accuracy metric. Data from the training partition of the clinical ES cohort was utilized in calculating PR AUC. The arithmetic mean of the five optimization points ( $c_1, c_2$ ) is the result of the statistical learning procedure. The returned mean optimization point values have been set as the default LR scalars in the CAVaLRi configuration settings ( $c_1 = 2.29, c_2 = 3.69$ ).

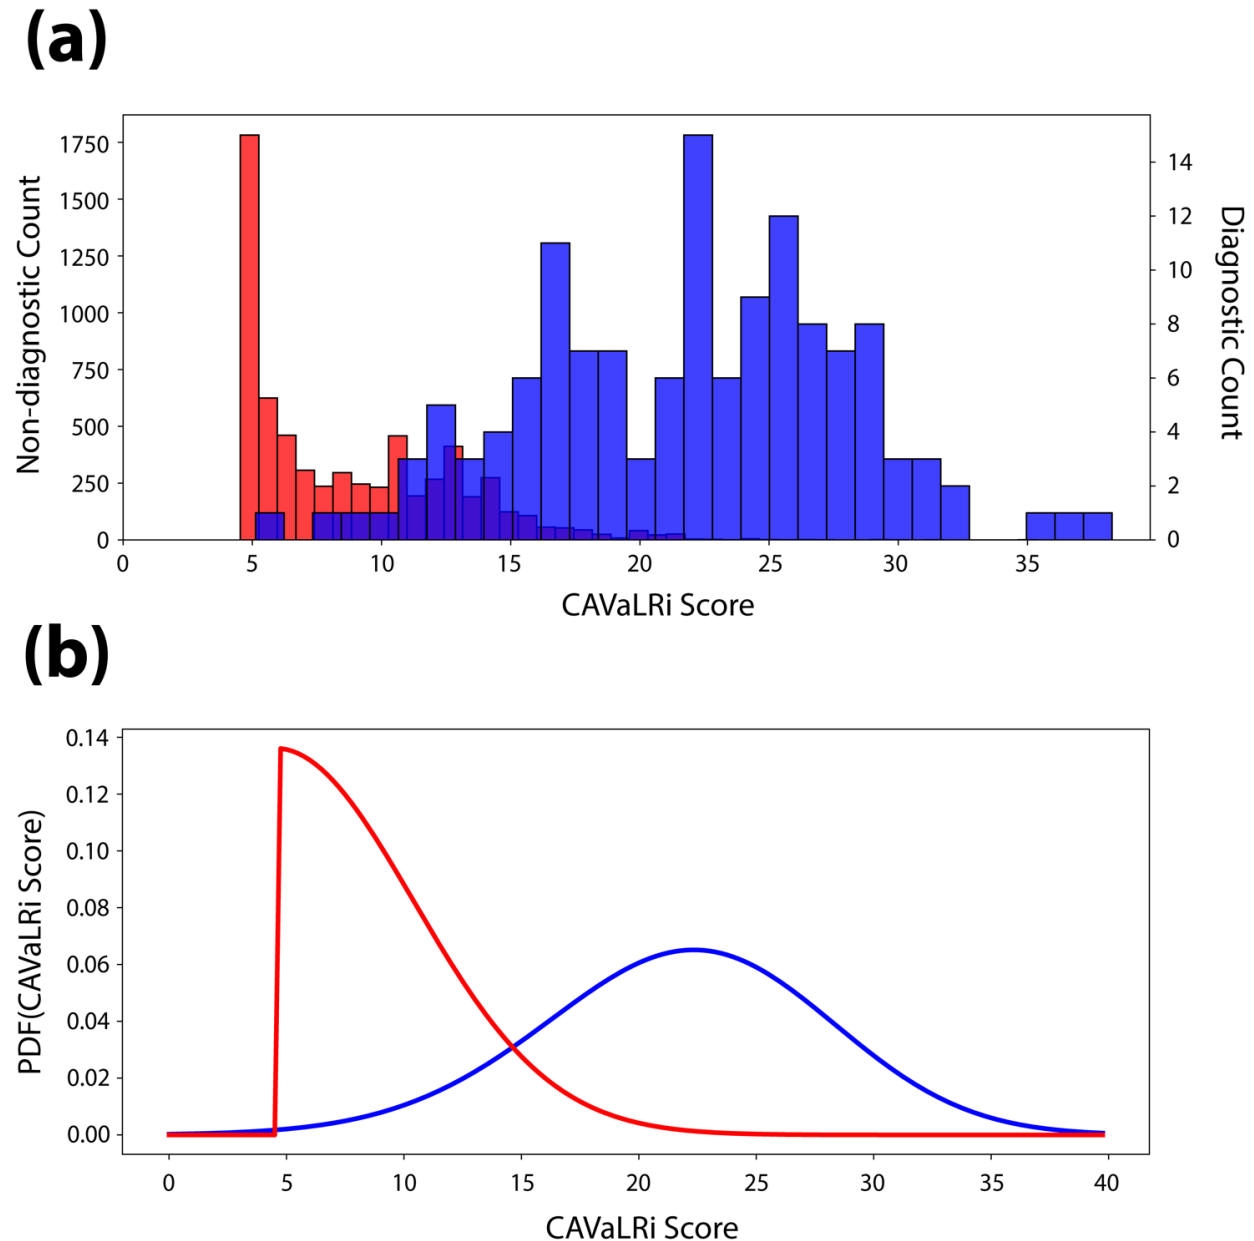

**SUPPLEMENTAL FIGURE 3. Fitting probability distributions for diagnostic and non-diagnostic variants.** (a) Histograms were generated from the CAVaLRi Score for all variants included in model training. Non-diagnostic variants are shown in red with counts indicated on the left y-axis; diagnostic variants are shown in blue with counts displayed on the right y-axis. (b) Skewed Gaussian distributions were fit individually for diagnostic and non-diagnostic variants. Associated probability density functions form the basis of the CAVaLRi posterior probability calculation (diagnostic parameters:  $\alpha = -1.06$   $\zeta = 26.25$ ,  $\omega = 7.59$ ; non-diagnostic parameters:  $\alpha = 1.38 * 10^7$ ,  $\zeta = 4.53$ ,  $\omega = 5.86$ ).

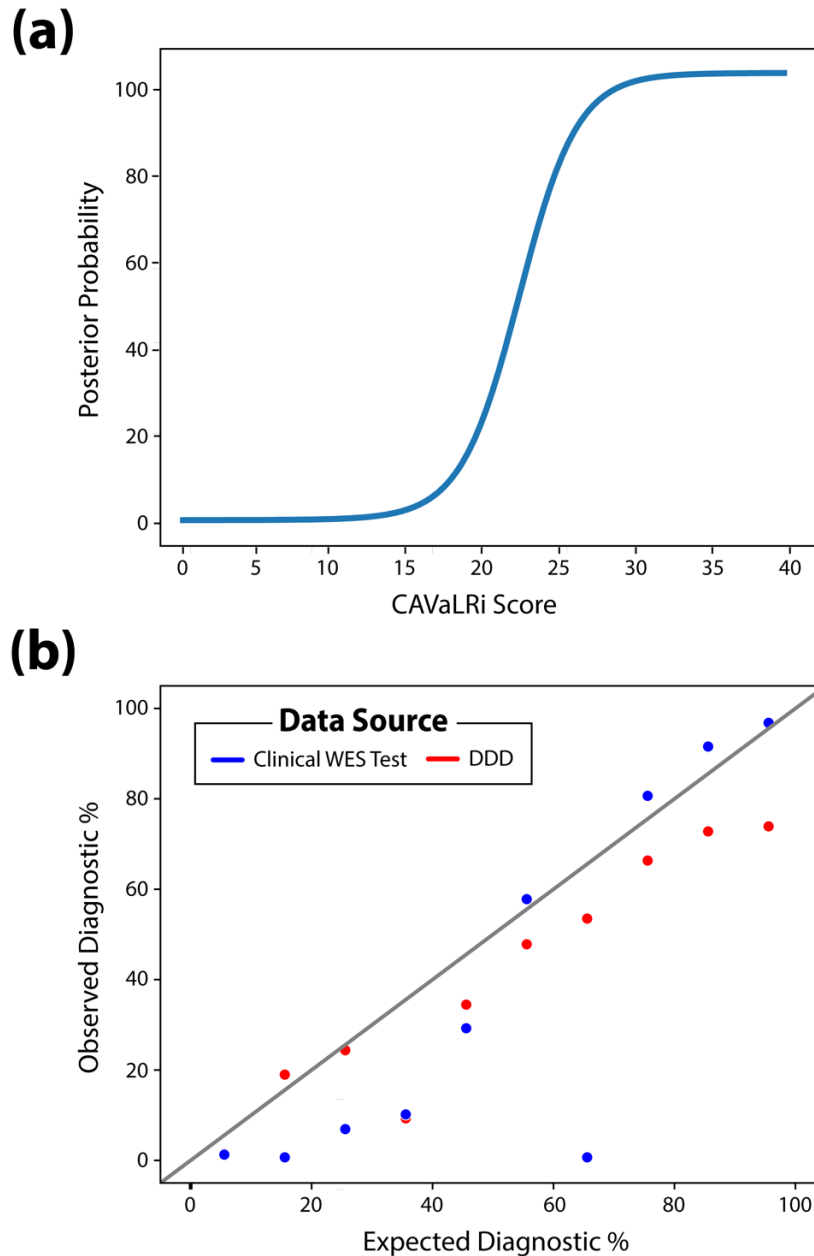

**SUPPLEMENTAL FIGURE 4. Observed and expected diagnostic variant frequencies indicate accurate modeling of posterior probability.** (a) Illustration of Equation 11 mapping CAVaLRi score to diagnostic posterior probability utilizing diagnostic and non-diagnostic Gaussian CAVaLRi score distributions. (b) Variants in the clinical ES test partition and DDD validation cohort were binned by predicted diagnostic probability (bin size 10). Average predicted values within these bins were used to calculate the expected diagnostic rate. The observed diagnostic rate within each bin was calculated by dividing the count of diagnostic variants by the total number of variants contained in each bin. The close alignment of expected and observed diagnostic rates supports the accuracy of the newly defined CAVaLRi posterior probability. Of note, CAVaLRi posterior probabilities were consistently higher than observed diagnostic ratios in the DDD cohort when diagnostic probability predictions were high. This may indicate that cohort calibration may be necessary in clinical settings.

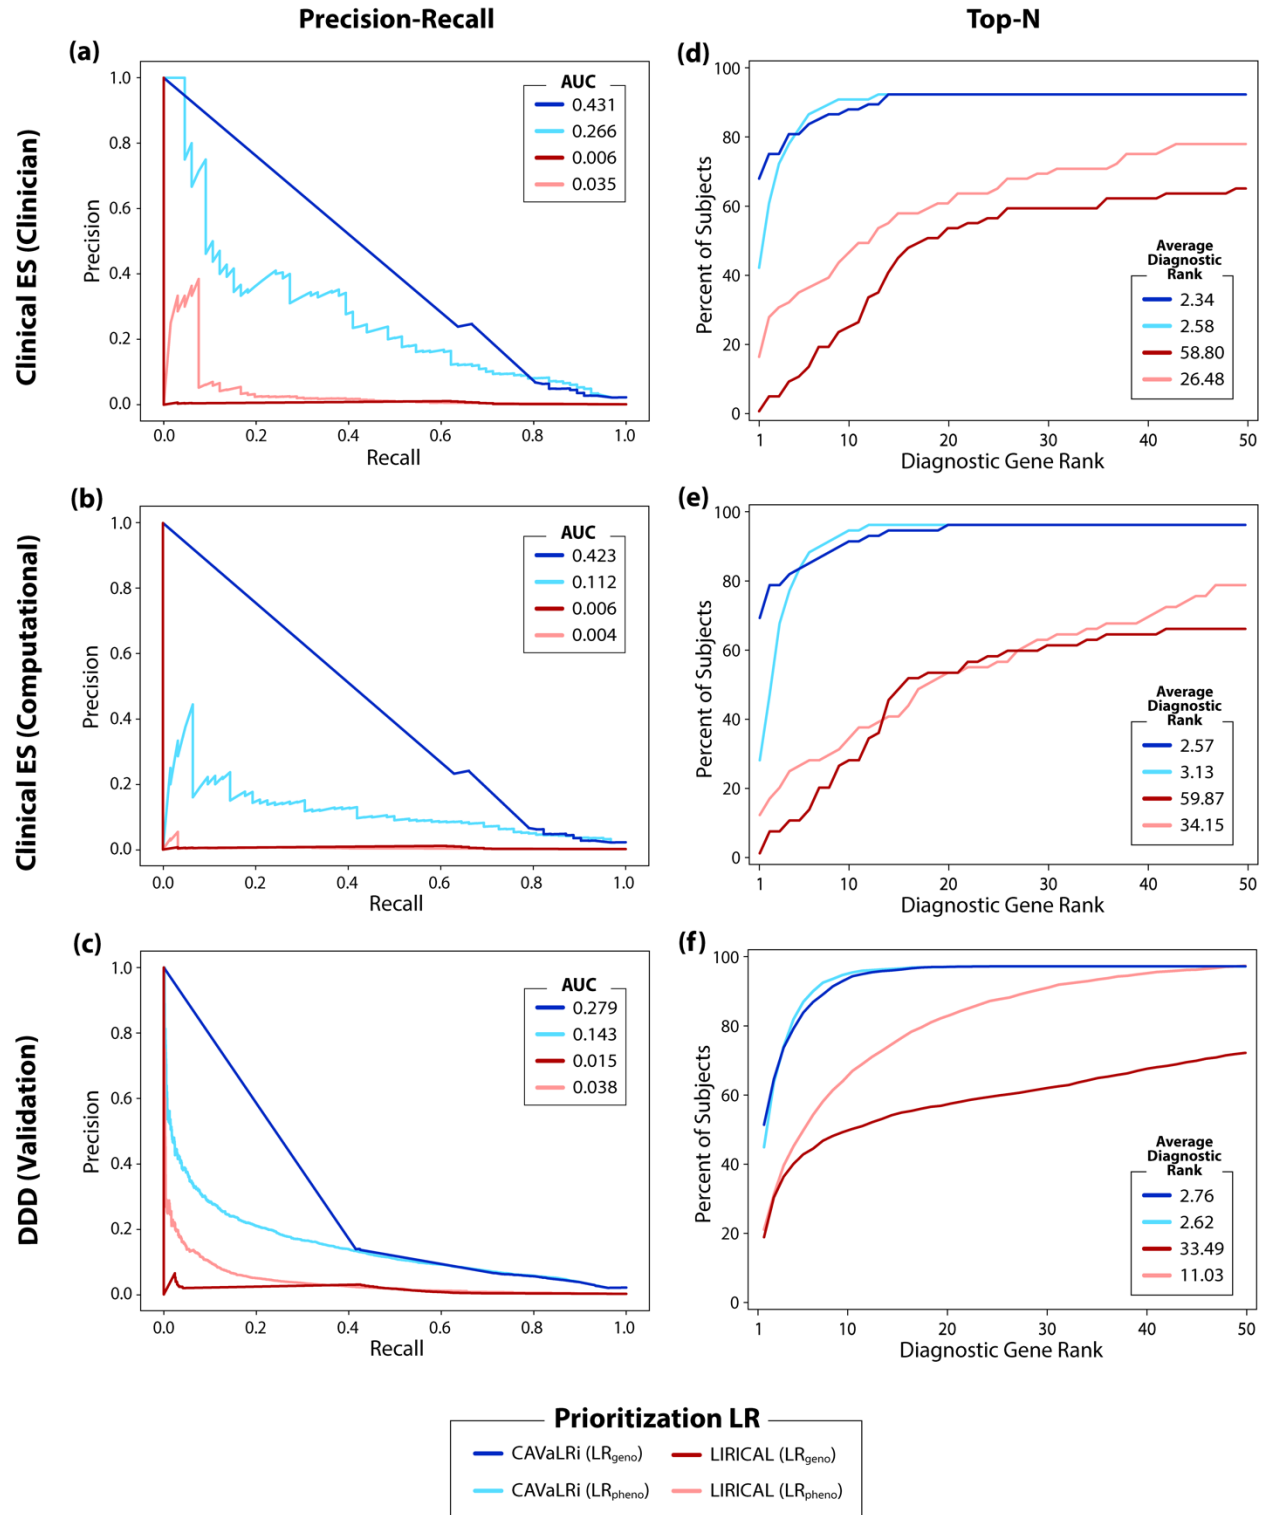

**SUPPLEMENTAL FIGURE 5. Diagnostic variant classification accuracy by component likelihood ratio.** CAVaLRi extends the likelihood ratio (LR) framework that was first described in LIRICAL. Precision-recall (a-c) and Top-N (d-f) curves are displayed to compare the diagnostic classification accuracy of the LR<sub>geno</sub> and LR<sub>pheno</sub> for CAVaLRi and LIRICAL. Three cohorts are illustrated, the Clinical ES test partition with clinician-curated phenotypes

(Clinical ES (Clinician), **a-b**), the Clinical ES test partition with NLP-curated phenotypes (Clinical ES (Computational), **c-d**), and the DDD cohort (DDD (Validation), **e-f**). Generally, CAVaLRi component LRs outperformed their LIRICAL equivalents, the CAVaLRi  $LR_{\text{geno}}$  outperformed the  $LR_{\text{pheno}}$  (with the exception of the average diagnostic rank in the DDD cohort), and the LIRICAL  $LR_{\text{pheno}}$  outperformed the  $LR_{\text{geno}}$ . Of note, LIRICAL seems to run in global mode when TSV formatted output is requested. HTML formatted output was generated to obtain  $LR_{\text{pheno}}$  and  $LR_{\text{geno}}$  values.



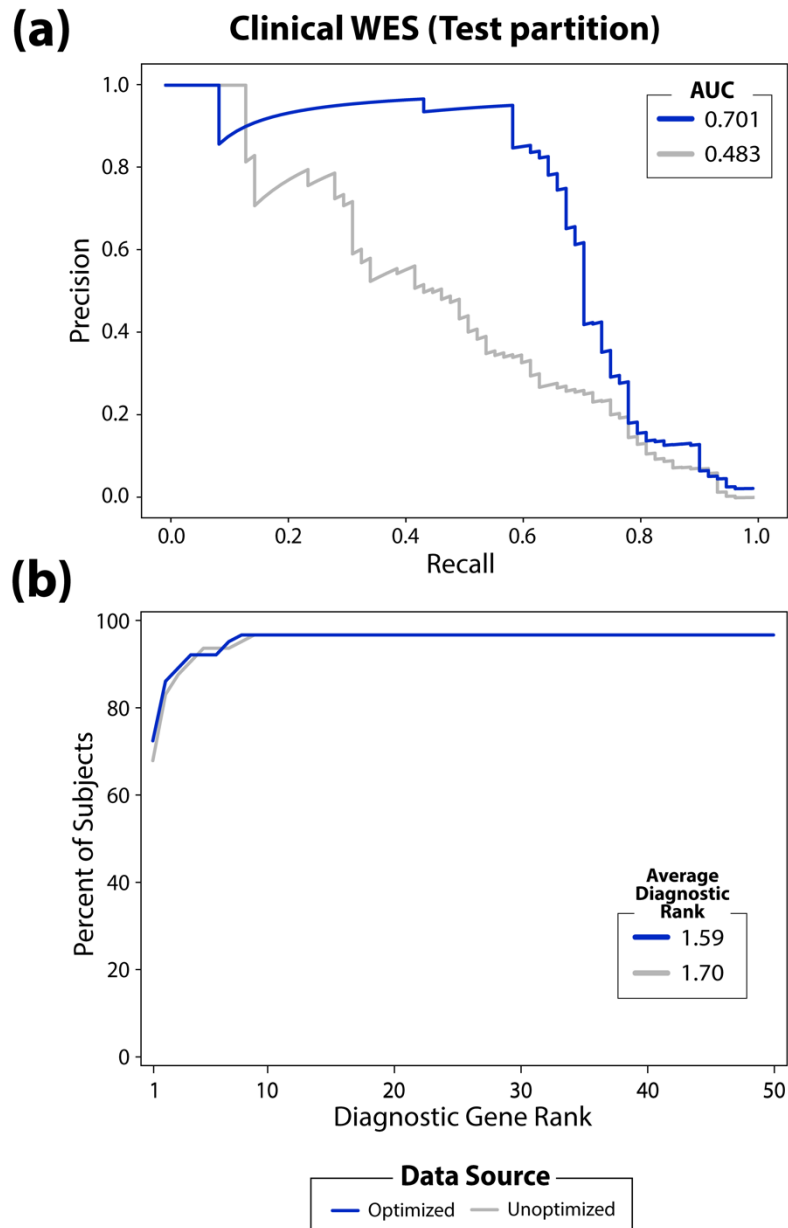

**SUPPLEMENTAL FIGURE 6. Optimizing the relative importance of likelihood ratios leads to significant gains in accuracy.** CAVaLRi achieves critical improvement in accuracy in the Clinical ES test partition after determining the relative importance of component likelihood ratios. CAVaLRi optimization yielded increases in both **(a)** precision-recall area under the curve (0.483 increased to 0.701) and **(b)** average diagnostic rank (1.70 decreased to 1.59)

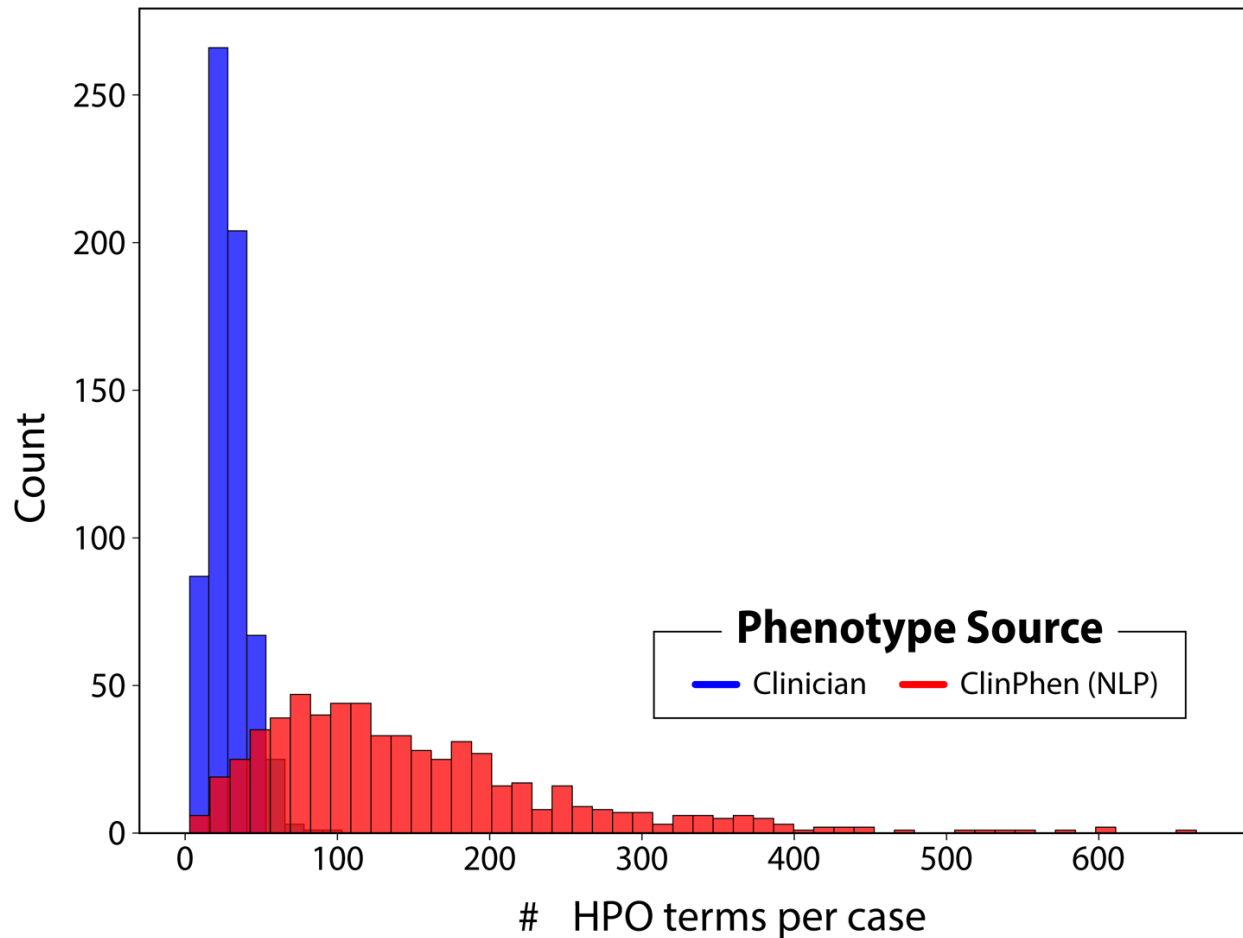

**SUPPLEMENTAL FIGURE 7. Sets of phenotype terms are substantially larger when using computational approaches than manual curation.** In practice, physicians manually review the clinical record to extract only the most genetically meaningful phenotype terms when ordering clinical ES testing. Natural language processing algorithms, namely ClinPhen, return far more terms on average than manually curated sets. Clinician curated set length (red): mean=30.1, SD=13.2; compared to computationally generated via ClinPhen (blue): mean=151.4, SD=102.6.

| Case       | Gene    | Variant (GRCh38)                 | Reasoning                                                              |
|------------|---------|----------------------------------|------------------------------------------------------------------------|
| DDDP100135 | SCN1A   | 2-165992435-A-T                  | Intronic for both selected and MANE transcripts                        |
| DDDP100153 | NSD1    | 5-177238305-G-A                  | Synonymous for both selected and MANE transcripts                      |
| DDDP100209 | KAT6B   | 10-75022006-G-A                  | Synonymous for both selected and MANE transcripts                      |
| DDDP100502 | ITPR1   | 3-4815123-A-C                    | 3' UTR for selected transcript, missense for MANE transcript           |
| DDDP101064 | KAT6B   | 10-75022006-G-A                  | Synonymous for both selected and MANE transcripts                      |
| DDDP101305 | SETD5   | 3-9468525-T-A                    | Missense for selected transcript, intronic for MANE transcript         |
| DDDP101570 | SNRPB   | 20-2467306-C-G                   | Missense for selected transcript, intronic for MANE transcript         |
| DDDP101628 | NRXN1   | 2-49974149-T-G                   | Intronic for both selected and MANE transcripts                        |
| DDDP102250 | TCF4    | 18-55228372-T-C                  | Intronic for both selected and MANE transcripts                        |
| DDDP103218 | ITPR1   | 3-4814521-G-C                    | 3' UTR for selected transcript, missense for MANE transcript           |
| DDDP103895 | MEF2C   | 5-88823891-C-T                   | 5' UTR for both selected and MANE transcripts                          |
| DDDP104933 | NKX2-1  | 14-36517958-G-C                  | 3' UTR for selected transcript, missense for MANE transcript           |
| DDDP106042 | IFITM5  | 11-299504-G-A                    | 5' UTR for both selected and MANE transcripts                          |
| DDDP106913 | PORCN   | X-48509783-G-A                   | 5' UTR for selected transcript, splicing for MANE transcript           |
| DDDP107539 | IFITM5  | 11-299504-G-A                    | 5' UTR for both selected and MANE transcripts                          |
| DDDP107924 | HNRNPU  | 1-244862480-TGTGTCATCGAA-T       | Intronic for selected transcript, frameshift for MANE transcript       |
| DDDP109280 | SMARCB1 | 22-23800933-T-G                  | Intronic for both selected and MANE transcripts                        |
| DDDP110855 | CPLANE1 | 5-37226811-A-C                   | 3' UTR for selected transcript, stopgain for MANE transcript           |
| DDDP110961 | ALG13   | X-111685040-A-G                  | 3' UTR for selected transcript, missense for MANE transcript           |
| DDDP111138 | NGLY1   | 3-25737407-G-A                   | Missense for selected transcript, synonymous for MANE transcript       |
| DDDP111266 | CASK    | X-41555605-G-A                   | Intronic for selected transcript                                       |
| DDDP111304 | MEF2C   | 5-88823814-G-A                   | 5' UTR for both selected and MANE transcripts                          |
| DDDP111509 | CAMK2A  | 5-150228191-C-T                  | Intronic for selected transcript, splicing for MANE transcript         |
| DDDP111580 | ITPR1   | 3-4814497-G-A                    | 3' UTR for selected transcript, missense for MANE transcript           |
| DDDP112008 | MEF2C   | 5-88823796-G-A                   | 5' UTR for both selected and MANE transcripts                          |
| DDDP112091 | HNRNPU  | 1-244862731-C-T                  | Intronic for selected transcript, splicing for MANE transcript         |
| DDDP112101 | GLI3    | 7-42023622-G-C                   | Intronic for both selected and MANE transcripts                        |
| DDDP112533 | KMT2D   | 12-49027152-G-T                  | Synonymous for both selected and MANE transcripts                      |
| DDDP112668 | WDR45   | X-49076771-T-C                   | Missense for selected transcript, intronic for MANE transcript         |
| DDDP112875 | ITPR1   | 3-4815176-CAGA-C                 | 3' UTR for selected transcript, inframe deletion for MANE transcript   |
| DDDP114293 | ST3GAL5 | 2-85848169-CT-C                  | Intronic for selected transcript, frameshift for MANE transcript       |
| DDDP115427 | STXBP1  | 9-127612378-C-G                  | 5' UTR for both selected and MANE transcripts                          |
| DDDP115727 | KAT6B   | 10-75022006-G-A                  | Synonymous for both selected and MANE transcripts                      |
| DDDP118412 | ST3GAL5 | 2-85848203-CT-C                  | Intronic for selected transcript, frameshift for MANE transcript       |
| DDDP118900 | HNRNPU  | 1-244862714-TTC-T                | Intronic for selected transcript, frameshift for MANE transcript       |
| DDDP121248 | ITPR1   | 3-4711828-T-C                    | 3' UTR for selected transcript, missense for MANE transcript           |
| DDDP121714 | KCTD1   | 18-26548477-AGCGCTGGCGCTGCCGCC-A | Intronic for selected transcript, inframe deletion for MANE transcript |
| DDDP122052 | GRIA2   | 4-157361561-T-G                  | Missense for selected transcript, intronic for MANE transcript         |
| DDDP122642 | WT1     | 11-32391967-C-T                  | Intronic for selected transcript, splicing for MANE transcript         |
| DDDP123526 | DNM1    | 9-128226027-G-A                  | Splicing for selected transcript, intronic for MANE transcript         |
| DDDP124153 | WDR26   | 1-224431591-T-C                  | Intronic for both selected and MANE transcripts                        |
| DDDP125386 | CREBBP  | 16-3769366-C-T                   | Intronic for both selected and MANE transcripts                        |
| DDDP125746 | ZC4H2   | X-64917770-G-GCT                 | Frameshift for selected transcript, 3' UTR for MANE transcript         |
| DDDP125766 | CPLANE1 | 5-37226580-A-C                   | 3' UTR for selected transcript, missense for MANE transcript           |
| DDDP125766 | CPLANE1 | 5-37226811-A-C                   | 3' UTR for selected transcript, stopgain for MANE transcript           |
| DDDP125767 | CPLANE1 | 5-37226580-A-C                   | 3' UTR for selected transcript, missense for MANE transcript           |
| DDDP125767 | CPLANE1 | 5-37226811-A-C                   | 3' UTR for selected transcript, stopgain for MANE transcript           |
| DDDP127064 | MEF2C   | 5-88823854-T-A                   | 5' UTR for both selected and MANE transcripts                          |
| DDDP127760 | SLC52A2 | 8-144360922-C-T                  | Missense for selected transcript, synonymous for MANE transcript       |
| DDDP127855 | MEF2C   | 5-88729356-A-C                   | Intronic for both selected and MANE transcripts                        |
| DDDP128881 | ITPR1   | 3-4814521-G-A                    | 3' UTR for selected transcript, missense for MANE transcript           |
| DDDP128906 | HUWE1   | X-53625900-CGGGACT-C             | Intronic for both selected and MANE transcripts                        |
| DDDP135483 | HUWE1   | X-53625871-G-GGGGCCA             | Intronic for both selected and MANE transcripts                        |
| DDDP136425 | KAT6B   | 10-75022006-G-A                  | Synonymous for both selected and MANE transcripts                      |
| DDDP137348 | GFAP    | 17-44908075-G-A                  | 3' UTR for selected transcript, missense for MANE transcript           |
| DDDP137672 | NIPBL   | 5-37022036-A-G                   | Intronic for both selected and MANE transcripts                        |
| DDDP138296 | OFD1    | X-13752714-C-A                   | Intronic for both selected and MANE transcripts                        |
| DDDP139049 | ITPR1   | 3-4814521-G-C                    | 3' UTR for selected transcript, missense for MANE transcript           |

**SUPPLEMENTAL TABLE 1. Diagnostic DDD cases excluded due to diagnostic variants occurring in non-splicing, intronic regions.** There were 56 diagnostic cases (58 variants) in the DDD cohort where the causal variant was in an intronic region not within 2 base pairs of an exonic splice region. These cases were omitted from the final analysis.

| Case       | Gene    | Variant (GRCh38) | Zygoty       | Biological Sex | Disease      | MOI |
|------------|---------|------------------|--------------|----------------|--------------|-----|
| DDDP102261 | PHF6    | X-134417289-C-T  | Heterozygous | Female         | OMIM:301900  | XLR |
| DDDP104701 | OGT     | X-71559365-T-A   | Heterozygous | Female         | OMIM:300997  | XLR |
| DDDP107584 | CDT1    | 16-88807284-C-T  | Heterozygous | Male           | OMIM:613804  | AR  |
| DDDP109173 | NRXN1   | 2-50922661-G-A   | Heterozygous | Female         | OMIM: 600565 | AR  |
| DDDP110885 | ARHGEF9 | X-63697176-A-T   | Heterozygous | Female         | OMIM:300607  | XLR |
| DDDP111554 | BRWD3   | X-80693016-AC-A  | Heterozygous | Female         | OMIM: 300659 | XLR |
| DDDP111896 | ARHGEF9 | X-63674082-T-TA  | Heterozygous | Female         | OMIM:300607  | XLR |
| DDDP113450 | FARS2   | 6-5613259-C-G    | Heterozygous | Male           | OMIM:614946  | AR  |
| DDDP115974 | NRXN1   | 2-50472472-C-T   | Heterozygous | Male           | OMIM: 600565 | AR  |
| DDDP117224 | SLC6A8  | X-153694347-G-A  | Heterozygous | Female         | OMIM:300036  | XLR |
| DDDP117298 | OTC     | X-38401372-G-C   | Heterozygous | Female         | OMIM:311250  | XLR |
| DDDP121636 | ARHGEF9 | X-63706287-AG-A  | Heterozygous | Female         | OMIM:300607  | XLR |
| DDDP123972 | PHF6    | X-134393557-T-A  | Heterozygous | Female         | OMIM:301900  | XLR |
| DDDP126473 | GRID2   | 4-93490747-T-C   | Heterozygous | Male           | OMIM:616204  | AR  |
| DDDP127185 | KDM5B   | 1-202729961-C-A  | Heterozygous | Female         | OMIM:618109  | AR  |
| DDDP132170 | CLCN5   | X-50090678-C-T   | Heterozygous | Female         | OMIM: 300009 | XLR |
| DDDP134103 | NRXN1   | 2-51027934-A-AGG | Heterozygous | Male           | OMIM: 600565 | AR  |
| DDDP134528 | PHF6    | X-134413956-A-G  | Heterozygous | Female         | OMIM:301900  | XLR |
| DDDP135070 | NRXN1   | 2-50538378-G-C   | Heterozygous | Female         | OMIM: 600565 | AR  |

**SUPPLEMENTAL TABLE 2. Diagnostic DDD cases excluded due to incompatible modes of inheritance.** There were 19 instances where a diagnostic variant was called diagnostic despite contrasting the annotated mode of inheritance. These cases were omitted from the final analysis.
